# Supplementary material
Source: PubMed Central journal article supplement (PMC2799737)
Supplement: 0906372106_0906372106SI.pdf [file 0906372106_0906372106SI.pdf]

# Supporting Information

Groschwitz et al. 10.1073/pnas.0906372106

## SI Methods

**In vitro permeability.** Caco2-bbe human intestinal adenocarcinoma cells (ATCC) were maintained in DMEM supplemented with 10% FCS, 0.1 mM nonessential amino acids, 1 mM sodium pyruvate, 10 mM Hepes, and 1× penicillin/streptomycin (all Invitrogen) in a humidified incubator (5% CO<sub>2</sub>, 37 °C). Cells (5 × 10<sup>5</sup>) were seeded on snapwells (12-mm diameter, 0.4-μm pore; Corning) and cultured for 18–21 days. TER was monitored with an EVOM/Endohm (Costar), only snapwells with TER >250 Ω·cm<sup>2</sup> were used. Baseline TER was measured and recombinant human chymase (0.005–0.5 U/mL; Sigma) added to the basolateral chamber. TER was monitored over 24 h, with some snapwells placed in Ussing chambers after 30 min or 4 h of stimulation for permeability assays using FITC-dextran as described above. Additional snapwells were treated for 12 h with 0.05 U/mL chymase preincubated with the serine protease inhibitor chymostatin (100 μM; Sigma) or vehicle (DMSO), and TER measured.

**Epithelial Cell Proliferation, Migration, and Apoptosis.** Bromo-2'-deoxyuridine (BRDU) in PBS was injected i.p. (0.2 mg/g body weight) and mice killed 24 h later. BRDU-labeled cells in the jejunum were detected using a BRDU staining kit (Zymed) per manufacturer's instructions. A minimum of 25 well-oriented, villus-crypt units were counted for BRDU<sup>+</sup> cells to quantify proliferation. The distance from the crypt base to the farthest BRDU<sup>+</sup> epithelial cell was measured for epithelial migration using ImageProPlus. Apoptotic cells were detected by cleaved caspase-3 immunohistochemistry (Cell Signaling).

**Immunofluorescence.** Jejunum was fixed in 4% paraformaldehyde followed by 30% sucrose. Frozen sections were brought to room temperature for 30 min, permeabilized in ice-cold acetone for 10 min, and blocked in 5% goat serum per 1% BSA per 0.05% Triton-X-100/TBS. Sections were incubated with primary antibodies: rabbit anti-fibronectin (1:80, Millipore), rabbit anti-claudin-3 (1:25, Zymed), rat anti-E-cadherin (1:500, Zymed), rabbit anti-Mcpt-1 or -4 [1:25, 1:250 (25)] or isotype control overnight at 4 °C. After washing, slides were incubated with AlexaFluor 488-conjugated goat anti-rabbit or AlexaFluor 594 goat anti-rat secondary antibodies (1:250, Molecular Probes) for 90 min and coverslipped with DAPI/Supermount G.

**Caco2 Cell Immunofluorescence.** Confluent Caco2-bbe cells grown on transwells were stimulated basolaterally with 0.05 U/mL human chymase for 0, 12, or 24 h. Cells were rinsed, fixed in 4% paraformaldehyde for 30 min on ice, permeabilized in 0.5% Triton-X-100/TBS for 10 min and blocked in 5% goat serum per 1% BSA per 0.05% Triton-X-100/TBS for 30 min. Cells were incubated with primary antibodies: rat anti-E-cadherin and rabbit anti-ZO-1 (1:250, Zymed) for 2 h followed by AlexaFluor 488-conjugated goat anti-rabbit Ig or AlexaFluor 594 goat anti-rat Ig (1:250, Molecular Probes). Transwell filters were placed on slides and coverslipped with DAPI/Supermount G.

**Protein and RNA Analysis.** Jejunum protein (30 μg) was separated under reducing and denaturing conditions on 4–12% Bis-Tris gels and transferred to nitrocellulose membranes. Membranes were blocked in 5% milk per 0.1% Tween-20 per TBS for 2 h. Rabbit primary antibodies against actin (1:2,000, Sigma), claudins-1, -2, and -3 (1 μg/mL, Zymed), and E-cadherin (1:1,000 Zymed), and a peroxidase-conjugated goat anti-rabbit Ig secondary antibody (1:10,000, Calbiochem) were used. Proteins were detected by chemiluminescence (ECL Plus, Amersham). Densitometric analysis was performed using Image J (National Institutes of Health). RNA analysis by quantitative real-time PCR was performed as described in ref. 1.

**Everted Gut Sac Method.** Jejunal mucosal permeability to FITC-Dextran (FD4) was assessed using the everted gut sac method as described in ref. 2. Permeability was expressed as the mucosal-to-serosal clearance of FD4 and fluorescence was determined by spectrophotofluorometry (Biotek).

**IgE-Mediated Passive Anaphylaxis.** Mice were injected with 50 μg anti-IgE antibody [EM-95 (21)] or saline. Rectal temperature was monitored for 1 h and serum collected. Mcpt1 serum levels were measured by ELISA according to manufacturer's instructions (Moredun Scientific).

**Hydroxyproline Assay.** Intestinal tissue was hydrolyzed overnight in 6 N HCl at 100 °C. The supernatant was neutralized with 1% phenolphthalein and titrated against 10 N NaOH, then mixed with isopropanol and chloramine-T/citrate buffer solution (pH 6.0). Erlich's reagent was added and incubated for 25 min at 60 °C then measured at 558 nm. Hydroxyproline levels were calculated using 4-hydroxy-L-proline (Calbiochem) as a standard.

1. Miller HR, Pemberton AD (2002) Tissue-specific expression of mast cell granule serine proteinases and their role in inflammation in the lung and gut. *Immunol* 105:375–390.
2. Wattanasirichaigoon S, Menconi MJ, Delude RL, Fink MP (1999) Effect of mesenteric ischemia and reperfusion or hemorrhagic shock on intestinal mucosal permeability and ATP content in rats. *Shock* 12:127–133.

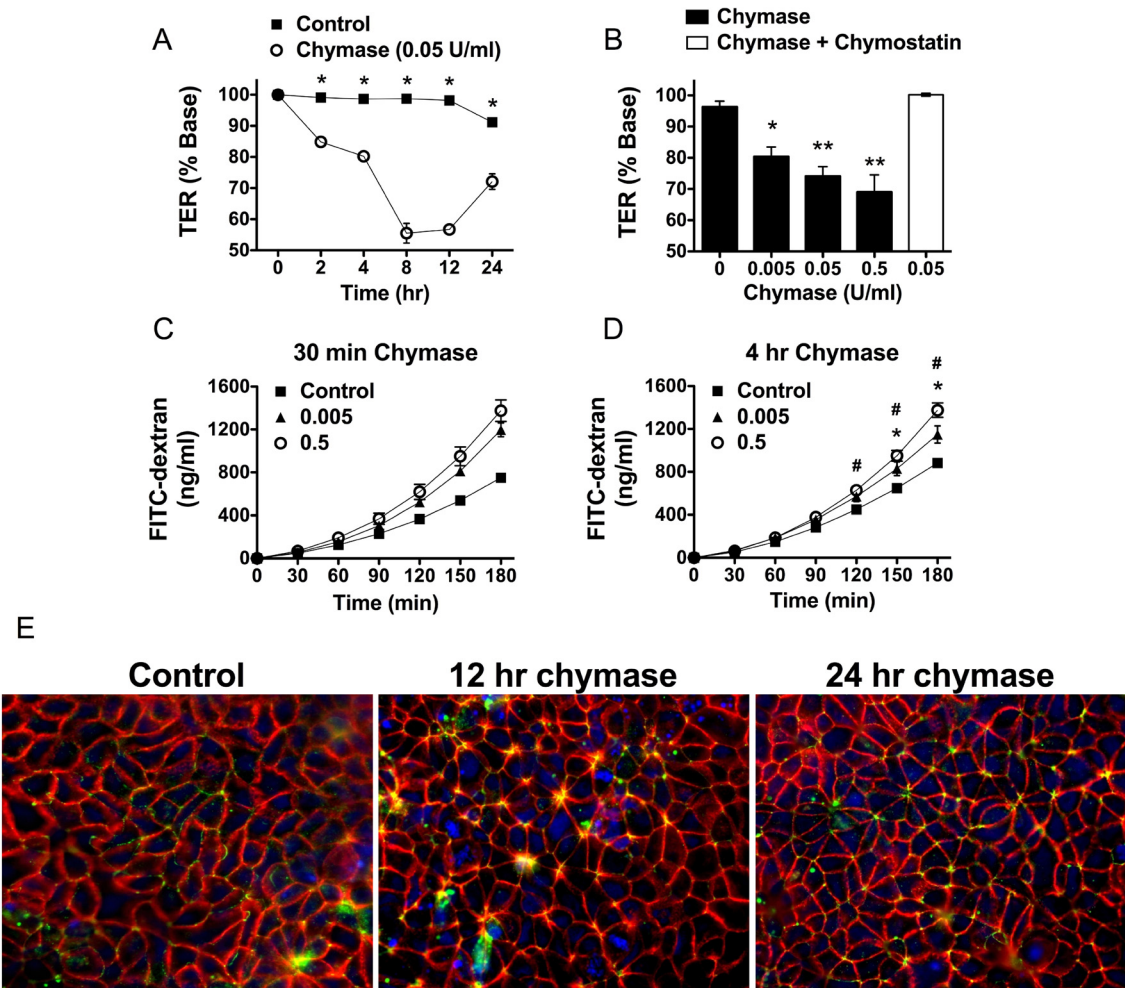

**Fig. S1.** Decreased jejunal permeability to FD4 in *Kit<sup>W-sh/W-sh</sup>* (Wsh) and *Mcpt4<sup>-/-</sup>* mice assessed by the everted gut sac method. Everted jejunum sacs were incubated in Krebs buffer containing FD4 and the mucosal-to-serosal clearance of FD4 was measured. Values represent mean  $\pm$  SEM;  $n = 5-12$  per group. Statistical significance is: \*,  $P < 0.005$  and \*\*,  $P < 0.001$  vs. control.

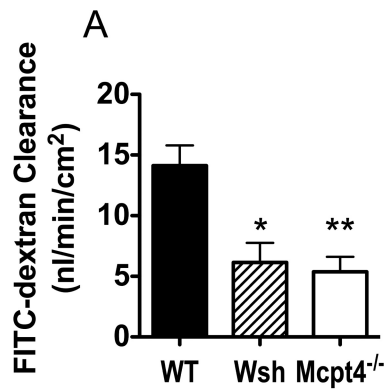

**Fig. S2.** Mcpt4-deficiency does not alter homeostatic intestinal mast cells. (A) Chloroacetate esterase reactive mast cells in the jejunum of WT, Mcpt4<sup>-/-</sup>, and *Kit<sup>W-sh/W-sh</sup>* (Wsh) mice were quantified per villus crypt unit (VCU) and localized to the villus, villus-crypt junction (V/C jxn), crypt, and submucosa. No positive cells were detected in the jejunum of mast cell-deficient *Kit<sup>W-sh/W-sh</sup>* mice. Values represent mean  $\pm$  SEM of 100 VCUs per mouse;  $n = 6-9$  mice per group. (B) Immunofluorescent detection of Mcpt1 (green; *Top*) and Mcpt4 (green; *Bottom*) in the jejunum of WT (*Left*) and Mcpt4<sup>-/-</sup> (*Right*) mice. Note the absence of Mcpt4 detection in Mcpt4<sup>-/-</sup> jejunum (*Bottom Right*). Nuclei are shown by DAPI (blue). (C) Serum Mcpt1 measurement and (D) rectal temperature change ( $\Delta$  Temp °C) at 15 min in WT and Mcpt4<sup>-/-</sup> mice after iv administration of 20  $\mu$ g anti-IgE (EM-95) or control antibody. Values represent mean  $\pm$  SEM;  $n = 4-6$  mice per group.

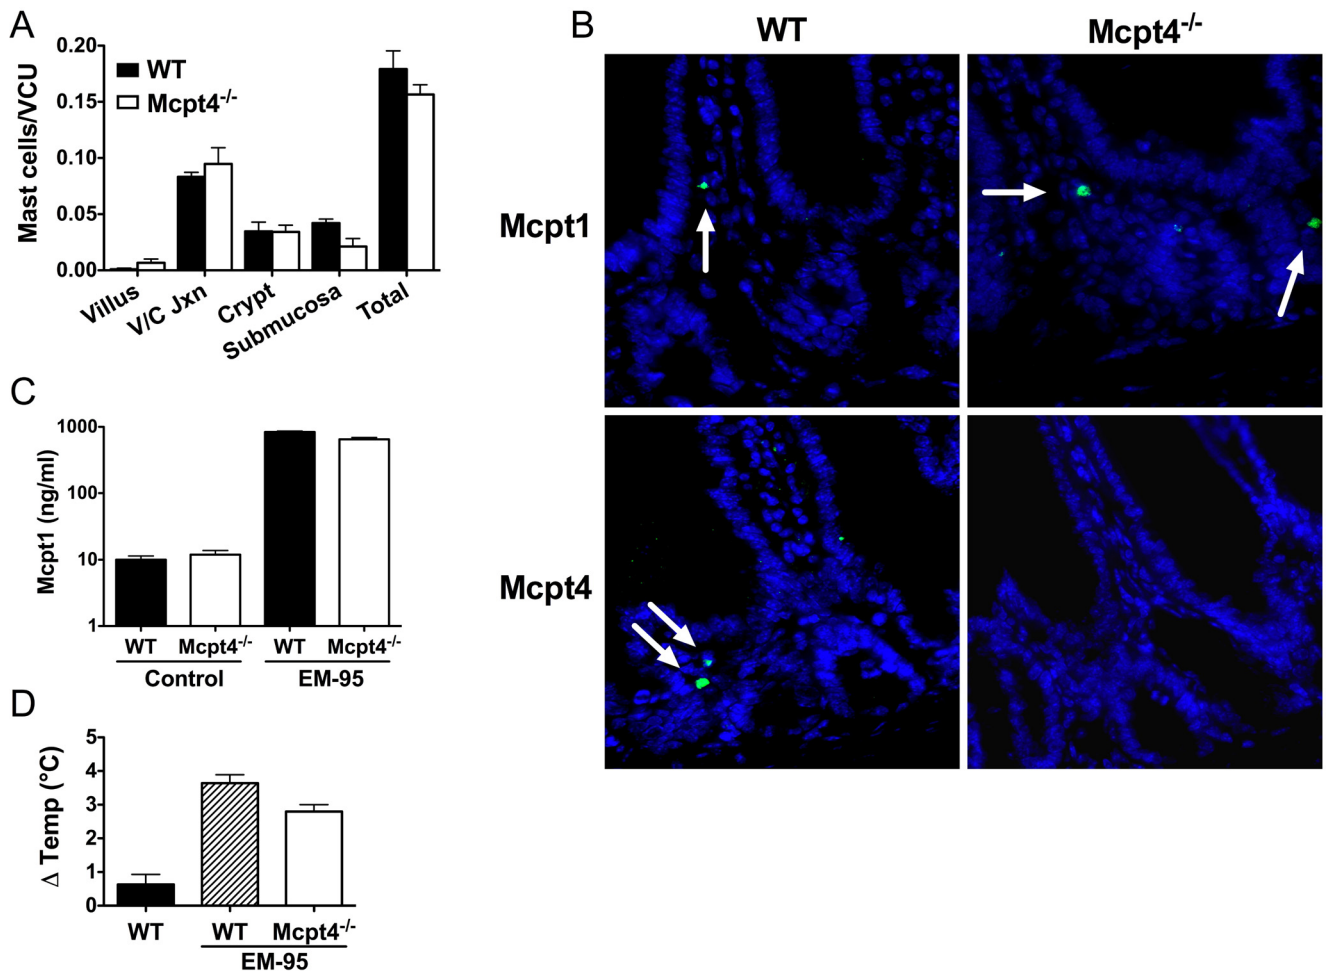

**Fig. 53.** Mast cell chymase alters intestinal epithelial permeability. Confluent Caco2-bbe cells cultured on snapwells were stimulated basolaterally with recombinant human chymase. (A) TER was measured from 0 to 24 h and expressed as a percentage of baseline TER (0 min) in the absence (■) or presence (○) of 0.05 U/mL chymase. (B) Dose-response TER changes to chymase were determined at 12 h in the absence (■) or presence (□) of the serine protease inhibitor, chymostatin 100  $\mu$ M. (C and D) Apical to basolateral flux of FITC-dextran measured at 30 min (C) and 4 h (D) after 0–0.5 U/mL chymase stimulation. To confirm Caco2-bbe cellular integrity and viability, (E) confluent Caco2-bbe cells cultured on transwells were stimulated with human chymase for 12 (Middle) or 24 (Right) h or with media alone as a control (Left) and E-cadherin (red) and ZO-1 (green) immunofluorescence was performed; nuclei stained by DAPI (blue). Values represent mean  $\pm$  SEM;  $n = 6$ –9 per group. Statistical significance is: (A) \*,  $P < 0.001$  chymase vs. control; (B) \*,  $P < 0.05$  and \*\*,  $P < 0.001$  chymase vs. control and chymase vs. chymostatin; (D) \*,  $P < 0.05$  low dose chymase (0.005 U/mL) vs. control and #,  $P < 0.05$  high dose chymase (0.5 U/mL) vs. control.

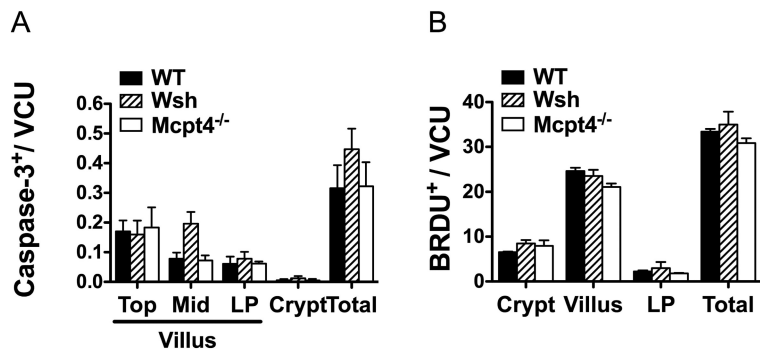

**Fig. S4.** *Kit<sup>W-sh/W-sh</sup>* and *Mcpt4<sup>-/-</sup>* mice do not display altered intestinal apoptosis or proliferation. Apoptotic and proliferating cells in the jejunum of WT, *Kit<sup>W-sh/W-sh</sup>* (Wsh), and *Mcpt4<sup>-/-</sup>* mice were quantified per villus crypt unit (VCU) and localized to the villus, crypt, and lamina propria. (A) Apoptotic cells were stained for cleaved caspase-3 and positive cells quantified per VCU. (B) Epithelial proliferation was measured by the incorporation of BRDU and quantified as BRDU<sup>+</sup> cells per VCU. Values represent mean ± SEM; *n* = 5–7 mice per group.

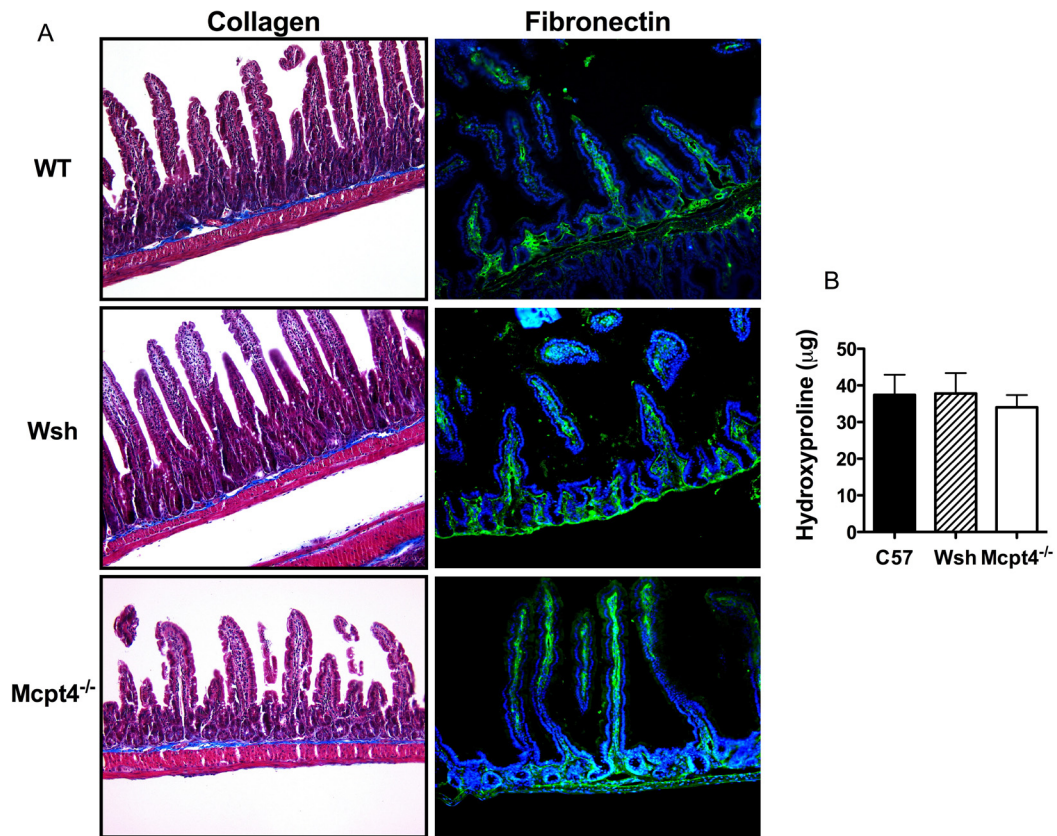

**Fig. S5.** Mast cell- and *Mcpt4*-deficiency does not alter the intestinal extracellular matrix. (*A* and *B*) Collagen and fibronectin expression were examined in the jejunum of WT, *Kit<sup>W-sh/W-sh</sup>* (*Wsh*), and *Mcpt4<sup>-/-</sup>* mice. (*A*) Collagen was examined by Trichrome staining (blue, *Left*) and by quantification of (*B*) hydroxyproline in the small intestine. (*A*) Fibronectin was analyzed by immunofluorescence (green, *Right*) with nuclei shown by DAPI (blue). Values represent mean  $\pm$  SEM;  $n = 5-7$  mice per group.
